# Supplementary material for: Long-term ice phenology records from East Central Europe
Source: Copernicus journal article supplement (doi:10.5194/essd-2017-117), 2017-11-06
Supplement: Supplementary file [file essd-2017-117-AC1-supplement.pdf]

**First of all we say thanks to Dr Corinna Gries for her time spent on the review of our manuscript. We appreciate that she evaluated the presented data as interesting. Below we provide replies to her questions typed in boldface.**

This is an important dataset of ice phenology data for the river Danube and the Lake Balaton. It will complement many other such datasets and allow for better analyses of the variations in ice phenology across the Northern Hemisphere. Many such data have been gathered by many authors and used extensively, however, every fresh water body behaves differently and large scale conclusions need to be based on datasets that account for this variation. Hence, this dataset will make an important contribution to this research area.

Since this paper only introduces the dataset there is not much more to discuss. Only very basic analyses have been done alluding to a different paper that goes into more depth analyzing these data in context.

**We appreciate that our Reviewer evaluated the presented data as interesting.**

The section 3 ‘Characteristics of the ice phenology’ is a bit tedious to read and I think a table could help make a little more sense of all those dates.

**The suggested table has been added to Section 3 summarizing the earliest, mean, and latest records of the studied ice phenomena on the Danube and Lake Balaton**

|                |                  | <b>earliest date</b> | <b>mean date</b> | <b>latest date</b> |
|----------------|------------------|----------------------|------------------|--------------------|
| <b>Danube</b>  | <b>ice-on</b>    | <b>14-Nov</b>        | <b>30-Dec</b>    | <b>26-Feb</b>      |
|                | <b>freeze-up</b> | <b>09-Dec</b>        | <b>14-Jan</b>    | <b>21-Feb</b>      |
|                | <b>break-up</b>  | <b>20-Dec</b>        | <b>19-Feb</b>    | <b>26-Mar</b>      |
|                | <b>ice-off</b>   | <b>30-Nov</b>        | <b>10-Feb</b>    | <b>28-Mar</b>      |
| <b>Balaton</b> | <b>ice-on</b>    | <b>20-Nov</b>        | <b>23-Dec</b>    | <b>11-Feb</b>      |
|                | <b>freeze-up</b> | <b>24-Nov</b>        | <b>30-Dec</b>    | <b>25-Feb</b>      |
|                | <b>break-up</b>  | <b>26-Dec</b>        | <b>21-Feb</b>    | <b>30-Mar</b>      |
|                | <b>ice-off</b>   | <b>31-Dec</b>        | <b>28-Feb</b>    | <b>08-Apr</b>      |

Detailed edits:

Page 3 line 17: There are relatively few stations (delete ‘a’)

**corrected**

Page 4 line 15: on ‘a’ daily basis

**corrected**

Page 4 line 24: the word is digitized not digitalized

**corrected**

Page 4 line 29: For ‘the’ sake of simplicity ‘hereafter’ ..

**corrected**

Page 9 line 12: ‘On’ the basis

**Thanks for the corrections of these mistakes.**
